# Supplementary material
Source: PubMed Central journal article supplement (PMC7297445)

**Pharmacokinetic/Pharmacodynamic Determination and Preclinical Pharmacokinetics of the Beta-lactamase Inhibitor ETX1317 and Its Orally Available Prodrug ETX0282**

**Supporting Information File**

John O'Donnell\*, Angela Tanudra, April Chen, Daniel Hines, Ruben Tommasi, and John Mueller

Entasis Therapeutics

35 Gatehouse Drive, Waltham, MA 02451

\*corresponding author email: [john.odonnell@entasistx.com](mailto:john.odonnell@entasistx.com)

**Table S1. Pharmacokinetics of ETX1317 following oral administration of ETX0282 to mice, rats, dog, and monkeys.**

| Species | Dose (mg/kg) | C <sub>max</sub> (µg/mL) | AUC (µg*h/mL) | T <sub>1/2</sub> (h) | F (%) |
|---------|--------------|--------------------------|---------------|----------------------|-------|
| Mouse   | 10           | 4.20                     | 5.03          | 1.2                  | --    |
| Mouse   | 50           | 22.4                     | 24.5          | 1.6                  | --    |
| Mouse   | 200          | 61.4                     | 65.1          | 0.8                  | --    |
| Mouse   | 400          | 97.2                     | 78.4          | 1.4                  | --    |
| Rat     | 10 equiv.    | 5.8±0.16                 | 7.04±0.62     | 1.1±0.3              | 98    |
| Dog     | 1 equiv.     | 1.27±0.02                | 2.68±0.24     | 1.3±0.6              | 97    |
| Monkey  | 0.94 equiv.  | 1.32±0.02                | 2.23±0.43     | 0.8±0.4              | 78    |

AUC = area under the curve. C<sub>max</sub> = peak concentration. Equiv. = mg/kg ETX1317 equivalent dose of ETX0282. F = bioavailability. T<sub>1/2</sub> = half-life.

**Table S2. Plasma protein binding of ETX1317 in humans and non-clinical species.**

| Species | Proportion unbound at different concentrations |      |        |
|---------|------------------------------------------------|------|--------|
|         | 1 µM                                           | 5 µM | 100 µM |
| Rat     | 94%                                            | 97%  | 83%    |
| Mouse   | 88%                                            | 100% | 90%    |
| Dog     | 92%                                            | 100% | 81%    |
| Human   | 82%                                            | 99%  | 80%    |
| Monkey  | 77%                                            | 97%  | --     |

**Figure S1. ETX1317 Plasma concentration vs. time profiles following IV (ETX1317) and oral (ETX0282) administration to rats (A), dogs (B), and monkeys (C).**

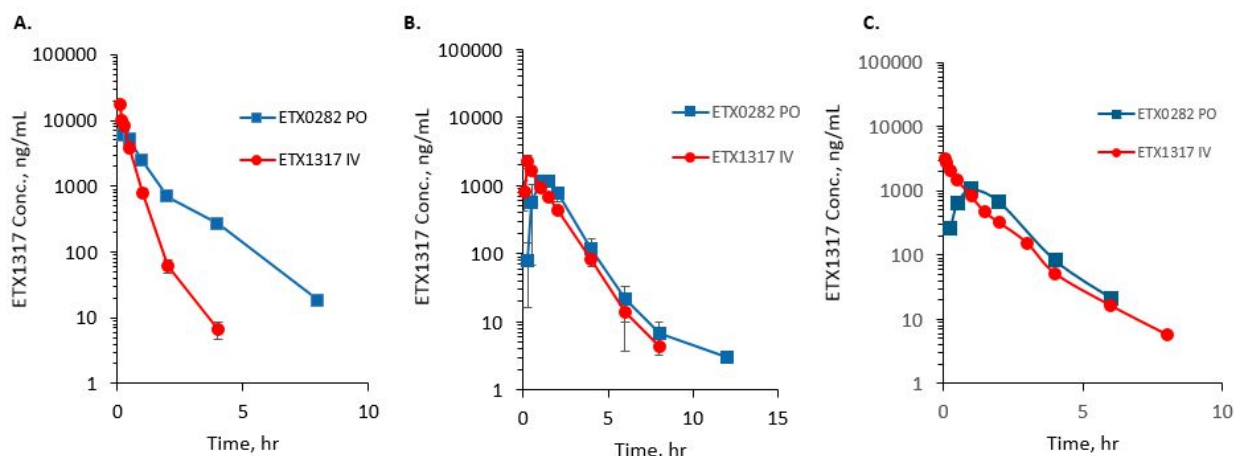

**Table S3. Percent Time > C<sub>T</sub> of 1 µg/mL of a 500 mg equivalent dose of ETX1317 based upon clearance, bioavailability, and absorption rate.**

| F% | V/F (L) | CL/F (L/h)  | Absorption rate     |                     |                     |
|----|---------|-------------|---------------------|---------------------|---------------------|
|    |         |             | 0.5 h <sup>-1</sup> | 1.0 h <sup>-1</sup> | 1.5 h <sup>-1</sup> |
| 60 | 41      | 17.6 - 23.7 | 69 - 58%            | 58 - 48%            | 54 - 42%            |
| 70 | 35      | 15.1 - 20.3 | 75 - 61%            | 61 - 51%            | 57 - 47%            |
| 80 | 31      | 13.2 - 17.8 | 78 - 63%            | 65 - 52%            | 60 - 49%            |

CL/F = oral clearance. F = bioavailability. h = hour. V/F = oral volume of distribution.

**Table S4. LC-MS/MS conditions for ETX1317, ETX0282, CPD CPDP in plasma, urine and MHBII**

|                    |                                                     |     |       |
|--------------------|-----------------------------------------------------|-----|-------|
| Instrument         | Schimadzu UPLC - Sciex QTRAP 6500 Mass Spectrometer |     |       |
| Column             | Atlantis T3, 5µ, 50 x 3.0mm                         |     |       |
| Column Temperature | 40°C                                                |     |       |
| Sample Temperature | 15°C                                                |     |       |
| Flow rate          | 1.200 mL/min                                        |     |       |
| Gradient           | Time (min)                                          | %B  | Curve |
|                    | Initial                                             | 2.0 |       |
|                    | 0.3                                                 | 2.0 | 6     |
|                    | 1.3                                                 | 98  | 6     |

|                 |                                                                                        |                                                                                                |   |
|-----------------|----------------------------------------------------------------------------------------|------------------------------------------------------------------------------------------------|---|
|                 | 1.75                                                                                   | 98                                                                                             | 6 |
|                 | 1.76                                                                                   | 2.0                                                                                            | 6 |
|                 | 2.00                                                                                   | Stop                                                                                           |   |
|                 |                                                                                        |                                                                                                |   |
| Divert Valve    | 0.40 min to Mass Spec<br>1.80 min to waste                                             |                                                                                                |   |
| Mobile Phase A  | 0.1% formic acid in water                                                              |                                                                                                |   |
| Mobile Phase B  | 0.1% formic acid in Acetonitrile                                                       |                                                                                                |   |
| MRM transitions | <u>ETX1317:</u><br>Q1: 273.986 → Q3: 94.000<br>DP 56.00<br>CXP 12.00<br>CE 37.00       | <u>cefpodoxime:</u><br>Q1: 428.000 → Q3: 241.000<br>DP 80.00<br>CXP 12.00<br>CE 21.00          |   |
|                 | <u>ETX0282:</u><br>Q1: 316.082 → Q3: 93.900<br>DP 41.00<br>CXP 14.00<br>CE 47.00       | <u>cefpodoxime proxetil:</u><br>Q1: 558.000 → Q3: 410.000<br>DP 80.00<br>CXP 12.00<br>CE 23.00 |   |
|                 | <u>Carbutamide (IS):</u><br>Q1: 272.1 → Q3: 156.1<br>DP 46.00<br>CXP 10.00<br>CE 25.00 |                                                                                                |   |
| MRM conditions  | Source Type                                                                            | Turbo Spray                                                                                    |   |
|                 | Polarity:                                                                              | Positive                                                                                       |   |
|                 | Resolution Q1:                                                                         | Unit                                                                                           |   |
|                 | Resolution Q3:                                                                         | Unit                                                                                           |   |
|                 | IS:                                                                                    | 2500.00                                                                                        |   |
|                 | TEM:                                                                                   | 550.00                                                                                         |   |

|                  |             |       |
|------------------|-------------|-------|
|                  | GS1:        | 60.00 |
|                  | GS2:        | 50.00 |
|                  | CAD:        | 10.00 |
| Injection volume | 0.5 $\mu$ L |       |

**Figure S2. Box-Whisker plots of CFU burden following treatment with CPDP, ETX0282, and CPDP:ETX0282 in a murine neutropenic thigh model.**

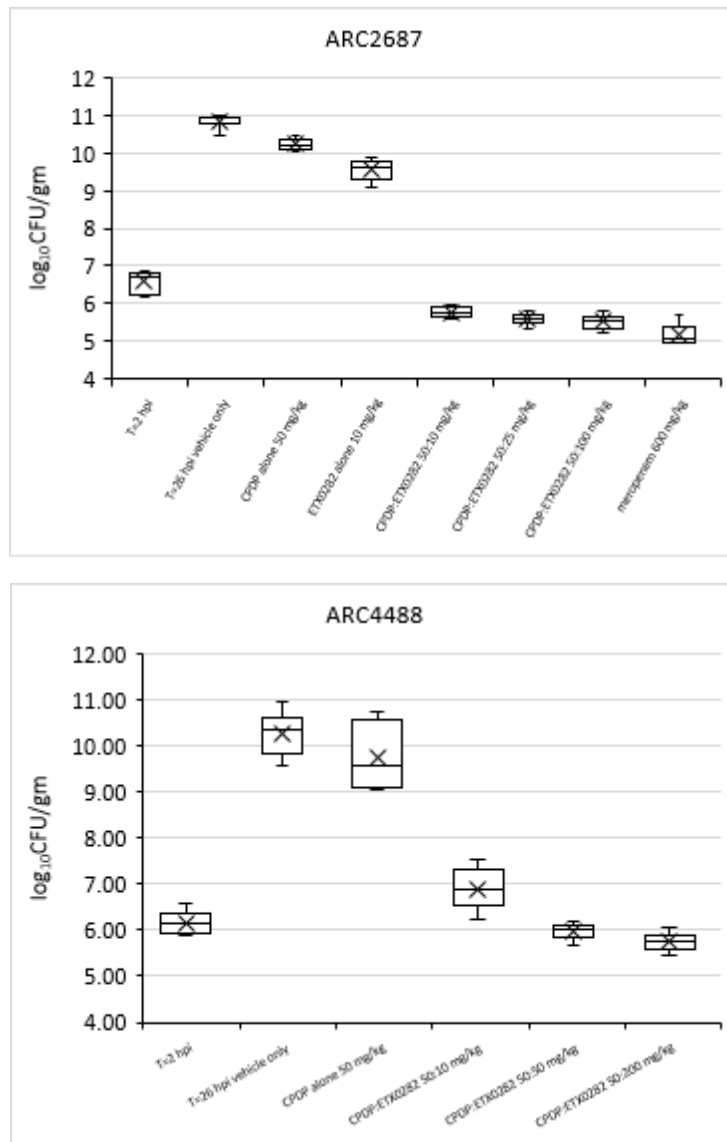

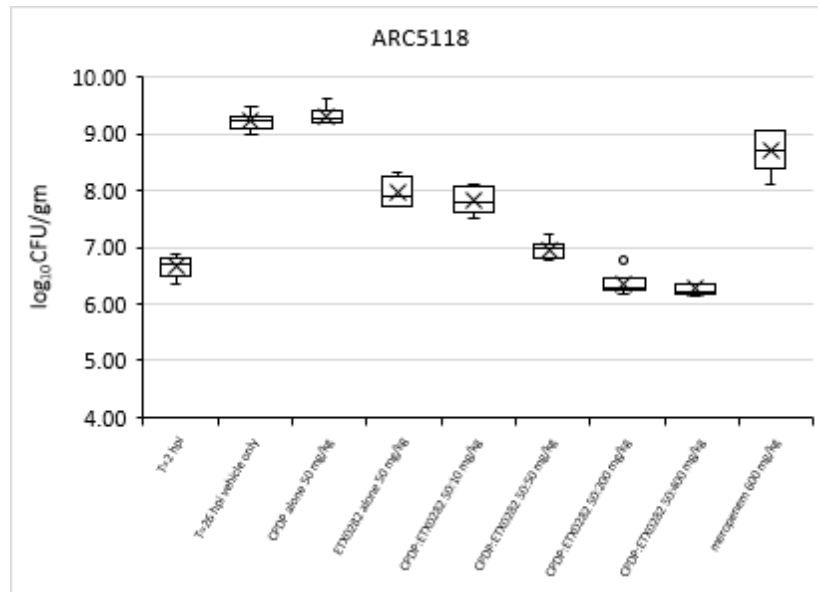

Supplement: id0c00019_si_001.pdf [file id0c00019_si_001.pdf]
